# Supplementary material
Source: publisher figshare collection journal article supplement (https://acs.figshare.com/ndownloader/files/4256734)
Supplement: Supplementary file 1 [file 4256734]

# Electronic Supporting Information.

## Boron Subphthalocyanine Dyes: 3-pentadecylphenol as a solubilizing molecular fragment.

*Emma R. L. Brisson,<sup>a</sup> Andrew S. Paton,<sup>a</sup> Graham E. Morse<sup>a</sup>, Jozef F. Maka<sup>a</sup> and Timothy P.*

*Bender<sup>\*,a,b,c</sup>*

a – Department of Chemical Engineering and Applied Chemistry, University of Toronto, 200 College  
Street, Toronto, Ontario, M5S 3E5

b – Department of Chemistry, University of Toronto, 80 St. George St., Toronto, Ontario, Canada, M5S  
3H6

c - Department of Materials Science and Engineering, University of Toronto, 184 College St., Toronto,  
Ontario, Canada M5S 3E4

\* - to whom correspondences should be addressed. Email: tim.bender@utoronto.ca

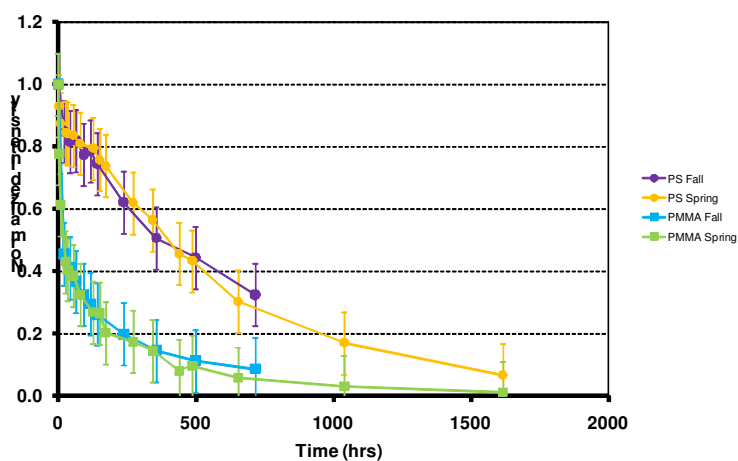

6a

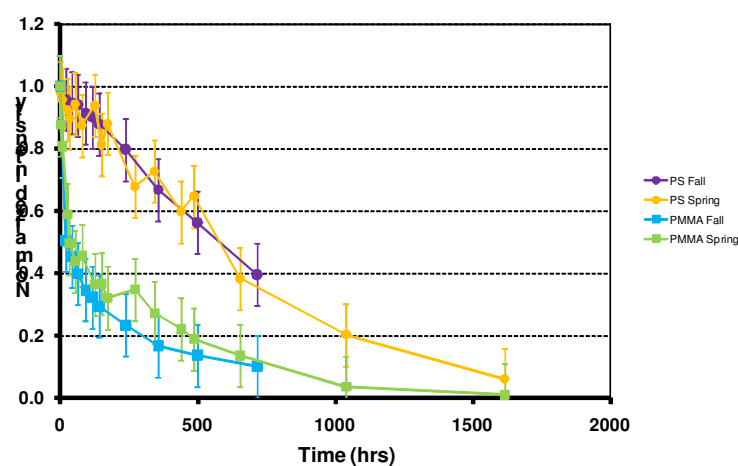

6b

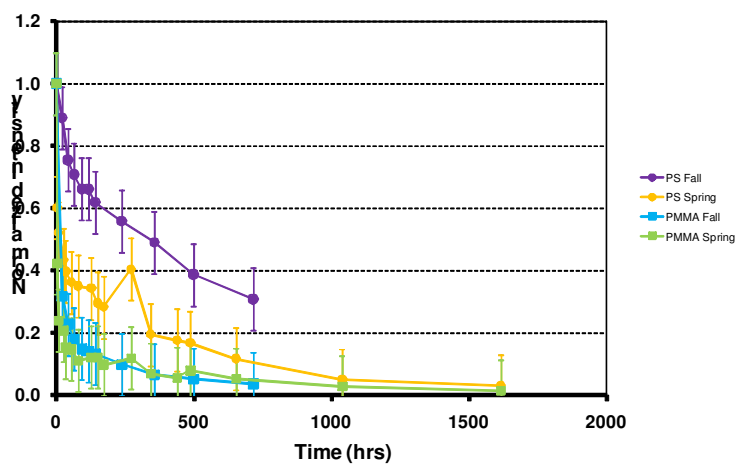

6c

**Figure S1:** A comparison of the photostabilities of compounds **6a**, **6b** and **6c** at two different times of the year, fall and spring.
